# Supplementary material for: Exposure to Phthalates Affects Calcium Handling and Intercellular Connectivity of Human Stem Cell-Derived Cardiomyocytes
Source: PubMed Central journal article supplement (PMC4370601; doi:10.1371/journal.pone.0121927), 2015-03-23

**S1 Figure. Quantitative real-time RT-PCR analysis.** No significant changes in the gene expression of sarcoplasmic reticulum  $\text{Ca}^{2+}$ -ATPase, muscle (SERCA2,  $p = 0.7$ ), calsequestrin-2 (CASQ2,  $p = 0.7$ ), ryanodine receptor 2 (RYR2,  $p = 0.8$ ), and connexin-43 (cnx43,  $p = 0.2$ ) were observed between control and DEHP-treated samples ( $n = 3$ ).

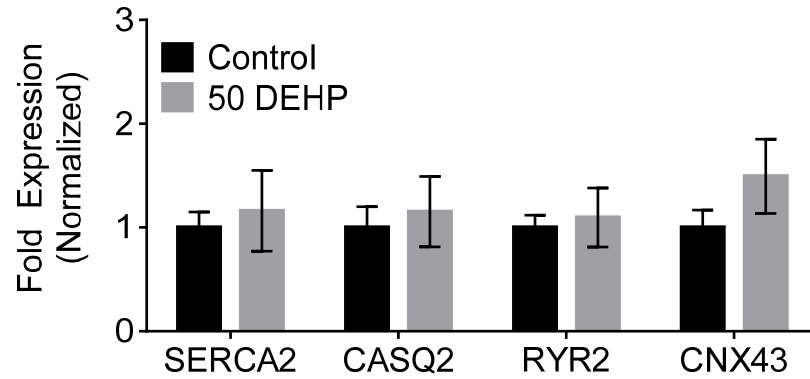

Supplement: pone.0121927.s001.pdf [file pone.0121927.s001.pdf]
